1 **Title**

2 **The effect of NMDA-R antagonist, MK-801, on Neuronal**  
3 **Mismatch along the Auditory Thalamocortical System**

4 **Authors**

5 Gloria G Parras<sup>1,2</sup>, MSc; Catalina Valdés-Baizabal<sup>1,2</sup>, PhD, Lauren Harms<sup>3</sup>, PhD,  
6 Patricia Michie<sup>3</sup>, PhD & Manuel S Malmierca, PhD<sup>1,2,4\*</sup>

7

8 **Affiliations**

9 <sup>1</sup> Cognitive and Auditory Neuroscience Laboratory, Institute of Neuroscience of Castilla  
10 y León (INCYL), Salamanca, Spain.

11 <sup>2</sup> The Salamanca Institute for Biomedical Research (IBSAL), Salamanca, Spain.

12 <sup>3</sup> School of Psychology, University of Newcastle, Callaghan, NSW, Australia; Priority  
13 Centre for Brain and Mental Health Research, Callaghan, NSW, Australia; Hunter  
14 Medical Research Institute, Newcastle, NSW, Australia.

15 <sup>4</sup> Department of Cell Biology and Pathology, Faculty of Medicine, University of  
16 Salamanca, Salamanca, Spain.

17

18 *Contact Information*

19 [\\* msm@usal.es](mailto:msm@usal.es)

20

21

22

23

24 **ABSTRACT**

25           The predictive coding framework has emerged as an appealing model of  
26 mismatch negativity (MMN). It has been repeatedly observed that MMN is reduced in  
27 schizophrenia. It is believed that the molecular correlate of this reduction is a NMDA-R  
28 hypofunction, a major model of the pathophysiology of schizophrenia. We have  
29 previously demonstrated that the neuronal index of mismatch is composed of repetition  
30 suppression (RS) and prediction error (PE). Therefore, the main goal of this study was  
31 to test how the NMDA-R antagonist, MK-801, affects RS and PE in single units along  
32 the rat auditory thalamocortical pathway. Results demonstrate enhanced RS at thalamus  
33 and PE at cortex. Moreover, results demonstrate that MK-801 alters the dynamics of  
34 adaptation along the thalamocortical axis. These single unit data correlate with the  
35 recordings of large-scale responses. This study opens new avenue for future research in  
36 the development of safe compounds that target similar binding locations to MK-801.

37

38

39 **Keywords:** Mismatch negativity, predictive coding, prediction error, repetition  
40 suppression, schizophrenia, auditory.

41

42

43

44

## 45 INTRODUCTION

46 The mismatch negativity (MMN) is an auditory event-related potential (ERP)  
47 that occurs when an unexpected stimulus (the deviant, DEV) interrupts a train of  
48 expected stimuli (standards, STD) in an *oddball* sequence. The MMN is commonly  
49 quantified as the difference between the size of the DEV ERP response and the size of  
50 the STD response (1).

51 The predictive coding framework has emerged as an appealing model of MMN  
52 (2) and of how sensory information is processed. According to predictive coding, the  
53 brain constantly generates top-down predictions from any regular ascending input that is  
54 compared with the actual sensory bottom-up signals. Stimuli that match predictions  
55 are suppressed, whereas unexpected stimuli discrepant with the prediction generate an  
56 enhanced error signal (3–6). NMDA-R dependent plasticity is believed to underpin the  
57 capacity of the brain to adjust internal predictions and use memory of recent past inputs  
58 to anticipate future stimuli (7).

59 There are two likely mechanisms underlying the MMN signal according to the  
60 predictive coding model. First, MMN could reflect *repetition suppression*. When the  
61 same stimulus is repeatedly presented, neuronal populations originally sensitive to that  
62 stimulus undergo adaptation and neural responses decrease (8). The repetition  
63 suppression has been conclusively demonstrated in the auditory cortex (AC) of animal  
64 models, surface recordings in humans as well as along multiple levels of the auditory  
65 hierarchy in rodents, including the inferior colliculus in midbrain and medial geniculate  
66 body (MGB) in thalamus (9).

67           At the same time, MMN could reflect a process of *prediction error*, where the  
68   sensory memory of the previously-heard stimuli establishes a predictive model, and the  
69   violation of this prediction upon presentation of an unexpected DEV stimuli, results an  
70   enhanced neural response that reflects the unexpectedness of the stimuli. Prediction  
71   error has been observed in human and rodent surface recordings when suitable control  
72   conditions have been included in the design of sound sequences (9–12). Single- and  
73   multiunit recordings in the rodent auditory system have demonstrated that prediction  
74   error responses are hierarchically organized, from midbrain to auditory cortex, and  
75   predominate in non-lemniscal areas (9,13). Therefore, there is strong evidence in both  
76   humans and rodents that MMN when extracted as a difference between STD and DEV  
77   responses receives contributions from both prediction error and repetition suppression.

78           MMN is found to be altered in number of different clinical conditions. Most  
79   notably, persons with schizophrenia have consistently been observed to have reduced  
80   MMN amplitude (14–16). This finding has been replicated in over 100 independent  
81   research. For persons with an established illness a large effect size approaching 1 has  
82   been observed (15) attesting to the replicability and substantive nature of reduced MMN  
83   in schizophrenia. Smaller MMN in schizophrenia has also been found to correlate with  
84   impaired cognition, and poorer psychosocial functioning (17,18), leading to the  
85   suggestion that MMN may be a useful biomarker for disease progression or risk (19). In  
86   humans, acute exposure to the NMDA antagonist ketamine or phencyclidine mimic the  
87   full range of schizophrenia symptoms in healthy participants (20), including reduced  
88   MMN size (for review see 21). An observation that posits that NMDA hypofunction  
89   underlies the neuropathology of the disorder (22). Importantly, schizophrenia-like

90 impairments and equivalent MMN reduction have been observed after acute  
91 administration of NMDA antagonists in animal models (23–26).

92 Our primary interest in this paper is whether NMDA-R antagonists  
93 differentially affect repetition suppression and prediction error. While some studies  
94 have demonstrated that MMN-like responses in rodents are altered by NMDA-R  
95 antagonists (27–30), only one report has examined the impact of prediction error on the  
96 MMN in surface recordings (31). There are no reports that have examined their effects  
97 on single-unit activity and local field potential recordings from the thalamus and  
98 auditory cortex.

99 Thus, it is unknown (i) whether there are differential effects of NMDA-R  
100 antagonism on prediction error as opposed to repetition suppression at the single unit or  
101 local field potential level, and (ii) the regional specificity of where effects of NMDA-R  
102 antagonists occur, for example, in the lemniscal *vs.* non-lemniscal auditory areas, or the  
103 thalamus *vs.* cortex. Therefore, in the current study, we use an acute exposure to a low  
104 dose of MK-801 to examine the impact of NMDA antagonism on individual responses  
105 of MGB and AC neurons while auditory oddball, many standards and cascade control  
106 sequences were presented (figure 1a-b). This design allowed us to delineate effects on  
107 repetition suppression *vs.* prediction error (figure 1c)(9,25,32,33). Our data show that  
108 MK-801 produces differential effects on responses to DEV and STD tones in oddball  
109 sequences, affecting the mismatch index along the thalamocortical system. Furthermore,  
110 we found an increase in repetition suppression in the thalamic regions, while prediction  
111 error responses were enhanced in the cortex.

112

113

## 114 **RESULTS**

115 We recorded a total of 290 well isolated neurons, 143 from the control group and 147  
116 from the MK-801-treated group. Since we found no statistically significant differences  
117 between the use of the cascade and many-standards sequences for the control group and  
118 MK-801 group, except for the MGB<sub>NL</sub> from the MK-801 group (table 1), the CAS  
119 sequence was chosen to control for repetition effects. This is because the CAS paradigm  
120 not only controlled for the presentation rate of the deviant stimuli, but also the  
121 frequency difference (ascending or descending) between standards and deviants in the  
122 oddball sequences.

123 **Effects of MK-801 on the neuronal firing rate.** MK-801 injection significantly  
124 reduced the responses to STD tones within all regions. By contrast, for responses to the  
125 DEV tones, we observed a significant increment in responses in AC but not for the  
126 MGB. When the firing rate of the cascade sequence was considered, MK-801  
127 differentially affected the AC and MGB such that CAS responses were significantly  
128 increased in the MGB<sub>NL</sub> but decreased in AC. These results reveal a differential effect  
129 of MK-801 on the refractoriness and salience of infrequent events at the single neuron  
130 level (Figure 2a, table 2).

131 **Effects of MK-801 on neuronal mismatch and its components.** Next we analyzed the  
132 differences between these normalized responses and computed three indexes (ranging  
133 between -1 and+1): 1) the index of neuronal mismatch (iMM=DEV-STD), similar to the  
134 typical SSA index used in previous single neurons studies; 2) the index of prediction  
135 error (iPE= DEV-CAS), that shows the relative enhancement of DEV tones compared

136 with CAS tones and 3) the index of repetition suppression ( $iRS=CAS-STD$ ) that  
137 reflects the level of response suppression due to the repetition effect, and is obtained by  
138 comparing the normalized responses to CAS and STD. It should be noted that the  $iMM$   
139 is the sum of  $iRS$  and  $iPE$  ( $iMM=iRS+iPE$ ).

140 The analysis of the  $iMM$  after the injection of MK-801 demonstrated that  $iMM$  values  
141 are significantly different from zero for all recording sites (figure 2b, table 1: Friedman  
142 test). But when comparisons between groups were considered, the analysis revealed that  
143 MK-801 increased the neuronal  $iMM$  (figure 2b- $iMM$ ; table 2). As described above,  
144 these changes are largely due to a reduced response to STD tones in all recording  
145 locations and an enhanced response to DEV in the AC.

146 Since  $iMM=iRS+iPE$ , an important advantage of these metrics is that we can determine  
147 how much of the mismatch index is due to the regularity of the context (RS) and/or to  
148 the occurrence of an infrequent event (PE). Thus, to determine which of these two  
149 components of the  $iMM$  is affected by MK-801, we computed the indices of  $iPE$  and  
150  $iRS$  separately.

151 Interestingly, MGB neurons in the MK-801 group did not show any sign of genuine  
152 deviance detection, as  $iPE$  values were almost zero and negative. While both AC  
153 showed a significant positive  $iPE$  (figure 2c;  $iPE$  values in table 1). When comparison  
154 between groups were analyzed an increased  $iPE$  for the MK-801 group in the AC were  
155 found, and even a further decreased  $iPE$  for the  $MGB_{NL}$  in the MK-801 group (figure 2c  
156 and e light and bright oranges;  $iPE$  in table 2). These data suggest that the MK-801  
157 produces an augmentation of saliency for novel stimuli processed in the AC.

158

159 Yet, the detection of rare or novel stimuli requires the establishment of a regular context  
160 or pattern. Therefore, we were also interested to find out if the refractoriness due to  
161 regularity was altered by MK-801. We calculated the iRS by assessing the response of  
162 the same tone when it was presented as CAS, with a 10% probability in a regular pattern  
163 and presented as STD with a probability of 90%, within an oddball paradigm, so it is in  
164 a much more regular context (Harms et al., 2014; Ruhnau et al., 2012). In both cases,  
165 we assume some level of regularity adaptation, but only a genuine repetition  
166 suppression can be determined if the responses to STD tones are lower than responses  
167 to CAS. Our results demonstrate that there is a significant repetition suppression effect  
168 in the MK-801 group along the thalamocortical pathway (figure 2d bright blue; iRS in  
169 table 1). The analysis also revealed that MK-801 produced a significant increase in  
170 repetition suppression at thalamic level but did not affect repetition suppression in the  
171 AC when compared with controls (figure 2d-e light and bright blues; results in table 2).

172 These results show that the auditory thalamus and cortex differ in the way repetition  
173 effects and prediction errors are processed. To confirm this hypothesis and considering  
174 that we have previously found an increase in the level of iPE along the thalamocortical  
175 hierarchy in awake and anesthetized animals (Parras et al., 2017), we fitted a linear  
176 model to assess if there is a similar increase in iPE along the thalamocortical pathway  
177 under MK-801. Using station (MGB and AC) and pathway (Lemniscal vs. Non-  
178 lemniscal) and their interaction as categorical factors, if MGB<sub>L</sub> is used as reference  
179 level for these factors, the fitted model is as follows:  $iPE =$   
180  $0.131 + 0.094 \cdot NL + 0.469 \cdot AC + 0.091 \cdot NL \cdot AC$ . Next, we applied an ANOVA to this model  
181 and found a significant effect of station ( $F=196.85$ ,  $p=3.65 \times 10^{-39}$ ) and pathway  
182 ( $F=13.19$ ,  $p=3.02 \times 10^{-4}$ ) but not for the interaction ( $F=1.54$ ,  $p=0.2138$ ). A subsequent



183 *post hoc* analysis confirmed that the iPE was higher at the MGB<sub>NL</sub> and AC ( $p < 0.05$   
184 within all comparisons). These results indicate that indeed, the sensitivity to detect  
185 novel stimuli increase significantly along the thalamocortical axis in the MK-801 group  
186 (figure 2e, iPE in orange).

187 Similarly, we also fitted a linear model for iRS in the MK-801 group. The resulting  
188 model was:  $iRS = 0.6412 - 0.0987 \cdot NL - 0.2753 \cdot AC + 0.0180 \cdot AC \cdot NL$ . The ANOVA  
189 demonstrate a significant effect for both categories (Station  $F = 108.07$ ,  $p < 0.000$ ,  
190 Pathway  $F = 13.23$ ,  $p < 0.000$ ), but not for the interaction ( $F = 0.1211$ ,  $p = 0.7280$ ). The *post*  
191 *hoc* comparisons confirmed decreasing levels of repetition suppression as one ascends  
192 along the hierarchy from thalamus to cortex and from lemniscal to non-lemniscal  
193 [figure 2e, iRS in blue; MGB<sub>L</sub> > MGB<sub>NL</sub> ( $p < 0.000$ ), from MGB<sub>L</sub> > AC<sub>L</sub> ( $p < 0.000$ ) and  
194 from MGB<sub>NL</sub> > AC<sub>NL</sub> ( $p < 0.000$ ); but not from AC<sub>L</sub> to AC<sub>NL</sub> ( $p = 0.0810$ )].

195 In summary, the changes described above demonstrate that NMDA-R antagonism has  
196 distinct effects on auditory scene analysis, as measured by the iPE and iRS, at different  
197 levels of the thalamocortical hierarchy.

198

199 **Effect of MK-801 on Spike-Density Function and indexes.** Next, we sought to  
200 identify how MK-801 affected the temporal responses to auditory stimuli (DEV, STD  
201 and CAS) by comparing spike-density functions (SDF) to each condition between  
202 groups. Analysis revealed the latency of the main peak for the SDF to DEV tones was  
203 mostly unaffected by MK-801 in the MGB, but it was clearly delayed by 40 and 60 ms  
204 in the AC<sub>L</sub> and AC<sub>NL</sub>, respectively. Furthermore, the magnitude of the SDF was altered  
205 at the AC and MGB<sub>NL</sub>, with the early component being reduced and the later sustained

206 component being enhanced (figure 3a, horizontal white line for significant differences  
207 at  $p < 0.05$ ). When the STD tones were considered, we observed a distinct and significant  
208 decrease of the SDF mostly at the AC and only marginally at the subcortical levels  
209 (figure 3b). Finally, MK-801 affected mostly the initial responses to cascade tones at all  
210 regions, being reduced in the auditory cortex but was earlier and increased in  $MGB_L$   
211 (figure 3c). The sustained portion of the SDF was only significantly increased in the  
212  $MGB_{NL}$ . Results show that MK-801 has a profound effect on the spike-density  
213 functions to DEV, STD and cascade stimuli.

214 Next, we studied where and when the MK-801 effect on the neuronal indices of iMM,  
215 iPE and iRS was significantly different from control. Thus, we examined whether in  
216 each group independently (MK-810 and control) these indices are different from zero,  
217 *i.e.*, is there a significant iMMN, iPE or iRS at each time point. Figure 3d-f highlights  
218 the significant time windows ( $p < 0.01$ ) with white and black asterisks for control and  
219 MK-801, respectively. The analysis revealed that under MK-801, there was a significant  
220 iMM along the thalamocortical axis (between 20-40ms for  $MGB_L$ , 20-80ms in  $MGB_{NL}$   
221 and from 20-190ms in both AC; Figure 3d, bright purple lines) and a significant iPE  
222 between 20 and 180ms in both AC, and a late iPE in the lemniscal thalamus between  
223 60-80ms and 140-190ms (Figure 3e, bright orange lines). We also found significant  
224 thalamocortical iRS (figure 3f, bright cyan lines; between 20-40ms for  $MGB_L$ , 0-100ms  
225 in  $MGB_{NL}$ , from 20-120ms in  $AC_L$  and between 40-100ms in  $AC_{NL}$ ).

226 When we compared the two groups, the analysis revealed that MK-801 produced a  
227 significant enhancement of iMM and iPE at both AC subdivisions ( $p < 0.000$  for iMM  
228 between 60-190ms in both AC; and  $p < 0.05$  for iPE ranging between 100 and 190ms in

229  $AC_L$  and between 60-190ms in  $AC_{NL}$ ; white horizontal lines in Figures 3 d-f). By  
230 contrast, iRS was affected more in the MGB ( $p<0.000$  between 5-35ms in  $MGB_L$ ;  
231  $p<0.000$  between 40-110ms in  $MGB_{NL}$ ;  $p<0.05$  between 60-130ms in  $AC_L$ ; and  $p<0.05$   
232 at 80ms in  $AC_{NL}$ ; white horizontal lines in Figure 3f). Thus, MK-801 produces an  
233 increase of iMM and iPE mostly in the late time window in AC, while iRS is much  
234 affected in the MGB.

235

236 **MK-801 affects the dynamics of adaptation.** Since MK-801 lowered and flattened  
237 responses to STD tones across the response window, we sought to assess the dynamics  
238 and the time course of adaptation (figure 4a). Results show that the control group (light  
239 gray arrows) exhibit a hierarchical timing for adaptation responses, becoming faster in  
240 higher order areas (from top to down, responses reach the half of the initial values at the  
241 fourth, ninth, twelfth and fourteenth standard tone, respectively). By contrast, results  
242 from the MK-801 group exhibited much faster adaptation dynamics (figure 4b; 50% of  
243 the initial response occurred at the third and second standard tones in MGB and AC,  
244 respectively;  $b$  values for control group:  $MGB_L=-0.1769$ ,  $MGB_{NL}=-0.4174$ ,  $AC_L=-$   
245  $0.6824$  and  $AC_{NL}=-1.175$ ; and for MK-801 group:  $MGB_L=-0.8499$ ,  $MGB_{NL}=-0.8853$ ,  
246  $AC_L=-1.712$  and  $AC_{NL}=-1.418$ ).

247 These data reveal that MK-801 alters the timing across the hierarchical organization of  
248 the auditory system, resulting in the lemniscal thalamus having almost the same  
249 adaptation velocity as the non-lemniscal cortex (arrows in Figure 4b). Furthermore,  
250 MK-801 reduces (almost by half) the steady-state plateau in the AC (dotted lines in  
251 Figure 4b;  $c$  values for control group:  $MGB_L=0.0776$ ,  $MGB_{NL}=0.2908$ ,  $AC_L=0.6084$

252 and  $AC_{NL}=0.7740$ ; and for MK-801 group:  $MGB_L=0.1428$ ,  $MGB_{NL}=0.2884$ ,  
253  $AC_L=0.3523$  and  $AC_{NL}=0.3834$ ).

254 All these results together support the idea that MK-801 produces a differential effect on  
255 adaptation and deviance detection along the thalamocortical axis, providing new  
256 evidence of a change in the firing pattern and temporal responses at single neuron level.

257

258 **Delayed and broader larger-scaled LFP responses.** Next, we wanted to check if the  
259 single unit responses correlated with larger-scale measurements of neuronal activity.  
260 The analysis of local field potentials (LFP) revealed that MK-801 produced significant  
261 changes in  $MGB_{NL}$  and AC (both in the lemniscal and non-lemniscal portions) for the  
262 deviant, standard and cascade LFPs (Figure 5a-c), such that they exhibited broader and  
263 longer responses for DEV-LFP and CAS-LFP in the auditory cortex, while the  
264 waveforms of these LFPs were shifted in latency for the  $MGB_{NL}$  due to a progressive  
265 delay of N1, P1 and N2 (note that this terminology refers to the first negative peak, first  
266 positive peak and second negative peak), showing delayed peaks of 8, 14 and 57ms for  
267 DEV-LFP and 6, 26 and 45ms delay for CAS-LFP in N1, P1 and N2, respectively  
268 (DEV-LFP: N1 peak for MK-801=  $-6.6\mu V$  at 20ms and control=  $-1.5\mu V$  at 12ms; P1  
269 peak for MK-801= $6.9\mu V$  at 41ms and control= $6.8\mu V$  at 28ms; finally, N2 peak for MK-  
270 801=  $-5.4\mu V$  at 102ms and control=  $-10.2\mu V$  at 45ms. CAS-LFP: N1 peak for MK-  
271 801=  $-6.5\mu V$  at 18ms and control=  $-1.2\mu V$  at 12ms; P1 peak for MK-801= $5.1\mu V$  at  
272 53ms and control=  $10.6\mu V$  at 27ms; finally, N2 peak for MK-801=  $-5.0\mu V$  at 91ms and  
273 control=  $-10.3\mu V$  at 45ms).

274 Similarly, we also sought significant LFP signals for each computed index (Figure 5d-  
275 f). The horizontal colored lines highlight the time at which significant deflections occur  
276 to each index-LFP for control and MK-801 groups independently (light and bright  
277 horizontal lines, respectively). Additionally, we compared these LFP indices between  
278 groups. The analysis of the MM-LFP shows that MK-801 elicited stronger and broader  
279 deflections within all regions (horizontal bright purple lines; Figure 5d) and abolished  
280 the late negative component (N2) in the AC (MGB<sub>L</sub>: N2 = 114-157ms; MGB<sub>NL</sub>: N1 =  
281 12-21ms, P1 = 32-63ms and N2 = 75-135ms; AC<sub>L</sub>: N1 = 10-57ms and P1 = 60-147ms;  
282 AC<sub>NL</sub> N1 = 20-53 and P1 = 60-144ms). Our data also demonstrate that MK-801  
283 produced a higher MM-LFP for virtually the whole LFP response within MGB<sub>NL</sub> and  
284 both AC, while no differences occurred in MGB<sub>L</sub>.

285 Similar to the spike population analysis, and considering that the PE-LFP and RS-LFP  
286 both contribute to the MM-LFP, we also wanted to understand how MK-801 shapes the  
287 LFP for prediction error and repetition suppression. In response to MK-801, the PE-LFP  
288 waveform was reduced at the early component of the MGB<sub>NL</sub>, while it was increased  
289 and delayed for the AC (orange horizontal lines in Figure 5e). Moreover, MK-801 also  
290 abolished the N2 deflection (MGB<sub>NL</sub>: N1 = 99-146ms; AC<sub>L</sub>: N1 = 30-65ms and P1 =  
291 87-180ms; AC<sub>NL</sub> N1 = 30-67 and P1 = 106-180ms). When PE-LFP was compared  
292 between groups, we only found differences in AC, mainly at the early (50-70ms) and  
293 late components (120-180ms). In other words, the lemniscal thalamus does not exhibit  
294 deviance detection, neither at the single neuron level nor at large-scale responses. Hence  
295 PE-LFP confirm single unit population data, where MK-801 produced greater levels of  
296 deviance detection in the auditory cortex (figure 2e).

297 Finally, MK-801 had similar effects on RS-LFP to those described above for MM-LFP  
298 and PE-LFP, eliciting broader and larger waveforms for MGB<sub>NL</sub> and AC (Figure 5f;  
299 MGB<sub>NL</sub>: N1 = 10-28ms, P1 = 34-63ms and N2 = 73-108ms; AC<sub>L</sub>: N1 = 10-55ms, P1 =  
300 67-140ms and N2 = 148-180ms; AC<sub>NL</sub>: N1 = 10-51, P1 = 55-132ms and N2 = 141-  
301 180ms). When differences between groups are considered, the non-lemniscal thalamus  
302 exhibited a shift in the waveform between 15-100ms, while for the cortex, responses  
303 over virtually the whole temporal window were increased by MK-801.

304

## 305 **DISCUSSION**

306 In this study, we demonstrate that the neuronal index derived from single cell  
307 recordings of mismatch is profoundly affected along the auditory thalamocortical  
308 system in rats treated acutely with a low dose of the NMDA-R antagonist, MK-801.  
309 Importantly, we also reveal that the two elements that make up the index of mismatch  
310 negativity, i.e., repetition suppression and prediction error, are differentially affected by  
311 MK-801 in single neurons at auditory thalamus and cortex. MK-801 increases repetition  
312 suppression in thalamus and prediction error in cortex. The increase in repetition  
313 suppression is more prominent in lemniscal areas of the thalamus, while the increase in  
314 prediction error is more evident in the non-lemniscal areas of cortex. Furthermore, our  
315 results demonstrate that MK-801 alters the dynamics of neuronal adaptation along the  
316 thalamocortical axis, becoming faster and stronger especially at thalamic level. These  
317 single unit data correlate with the recordings of large-scale responses, LFPs, as they  
318 exhibit delayed and broader deflections. In summary, our work demonstrates that the  
319 MK-801 increase of the neuronal mismatch in the auditory cortex 60ms after stimulus

320 onset is due to the combined effect of an increment in the sustained responses to deviant  
321 tones and a decrease to standard tones. It should be noted that, in contrast to most  
322 previous studies using large scale recording procedures to study neuronal population  
323 activity in rodents such as LFPs or EEG via skull screws, we have also recorded single-  
324 unit activity, an excellent technique for revealing activity patterns that are present at the  
325 single neuron level.

326         It is well established that NMDA-R plays a fundamental role in neuronal  
327 plasticity, controlling long-term potentiation and depression (34). Further, it is generally  
328 accepted that human MMN is reduced after NMDA-R antagonist treatments because  
329 NMDA-R antagonist blocks synaptic plasticity, precluding the formation of a memory  
330 trace for the standard tones (21). As we have seen in our results, MK-801 reduces  
331 responses to standard tones thus increasing repetition suppression.

332         Although this finding supports the hypothesis that NMDA-R antagonists alter  
333 sensory-memory formation (35), the findings that low dose (0.1 mg/kg) MK-801  
334 treatment produces a significant increment in the response to the deviant tones, in  
335 prediction error and hence, an increment in the neuronal mismatch are in the opposite  
336 direction to those expected. It is clear that the role of NMDA-R in the generation of  
337 MMN is considerably more complex than thought (36). There have been suggestions in  
338 the literature of precedents for our observations. Even considering that MK-801 has  
339 160 times the affinity of ketamine to NMDA-R, necessitating higher ketamine doses for  
340 similar drug effect (37), our results conform with those that report an increment in  
341 amplitude and latencies to deviant responses after the acute ketamine treatment in rats  
342 (38) and with a sub-anaesthetic dose of ketamine in healthy humans producing larger  
343 N100 to deviant tones but not MMN (39). Interestingly, a dose response study of the

344 MK-801 effects on MMR-like responses in male rats showed that while a high dose  
345 (0.5mg/kg) reduced late deviance detection (around 55ms), a medium dose (0.3mg/kg)  
346 significantly enhanced early deviance detection effects (at about 13 ms) and some  
347 evidence of enhanced late effects although not significantly (31). We used a single  
348 dose of 0.1mg/kg, as it has been demonstrated that female rats are more sensitive to  
349 MK-801 than males (40) and that this dose is enough to induce behavioral/sex effects  
350 (41). Importantly, memantine, a low affinity uncompetitive agonist of NMDA-R, has  
351 been shown to increase (i) the duration of rodent MMN-like responses (30), (ii) increase  
352 MMN amplitude in healthy individuals (42), and (iii) in persons with schizophrenia  
353 (43).

354 The memantine results suggest an interpretation of our findings in terms of the  
355 mechanisms underpinning synaptic plasticity (44). Partial blockade of NMDA-R  
356 channels (such as mediated by memantine, or low dose MK-801) is also likely to reduce  
357 background calcium flux resulting in homeostatic upregulation of NR2B-containing  
358 NMDA-Rs leading in turn to the conversion of synapses to a plastic state. That is,  
359 while these drugs reduce calcium influx during uncorrelated activity, there is increased  
360 calcium influx during correlated activity (produced by physiological stimuli), increased  
361 signal to noise, facilitated transmission and increased plasticity (45,46).

362 Other characteristics of the neuronal mechanisms and microcircuitry involving  
363 the glutamate NMDA-R system are relevant to the effects we have observed on the  
364 neuronal mismatch after the MK-801 treatment. NMDA-R are located, not only at  
365 postsynaptic and presynaptic sites in excitatory neurons, but they are also found at  
366 GABAergic inhibitory interneurons in neocortex (47). MK-801 has demonstrated a  
367 preferential regulation of the firing rate of cortical GABA interneurons, increasing the



368 firing rate of the majority of pyramidal neurons (48) and therefore producing an  
369 imbalance in the excitatory/inhibitory networks in the cortices (49–51). It is well known  
370 that cortical GABAergic interneurons differentially amplify stimulus-specific adaptation  
371 (a similar phenomenon to IMM) in excitatory pyramidal neurons in auditory cortex (52).  
372 Moreover, a model of a mutually coupled excitatory/inhibitory network can explain  
373 distinct mechanisms that allow cortical inhibitory neurons to enhance the brain's  
374 sensitivity to deviant or unexpected sounds (53). Further MK-801 would alter the tonic  
375 inhibitory control of NMDA-R in cortical areas leading to the activation of pyramidal  
376 neurons by subsequent deviant tones.

377         The increased repetition suppression we observed in the medial geniculate body  
378 can also be by the altered excitatory/inhibitory balance. Although the rat MGB lacks  
379 GABAergic neurons, it receives GABAergic input from the thalamic reticular nucleus  
380 (TRN) and the inferior colliculus (54,55). The latter is a source of bottom-up inhibitory  
381 influences while the TRN provides the MGB with an indirect and inhibitory feedback  
382 activation from AC (56). Cortical stimulation hyperpolarizes TRN neurons and  
383 increases their inhibitory output to the MGB (57) and furthermore, TRN has been  
384 demonstrated to profoundly influence SSA in the MGB (58). Changes in the  
385 thalamocortical neuronal firing pattern of thalamic neurons into bursts have been  
386 suggested to provide an alerting signal to the cortex to enhance stimulus detection (59).  
387 Overall our results match the general concept that when the system is adapted, it is more  
388 sensitive to detect changes in the environment (60), where a stronger thalamic repetition  
389 suppression (or inhibition) support the increase in the prediction error signals  
390 (excitatory) at cortical level, or vice versa. It would be very interesting to test whether

391 thalamic repetition suppression is correlated with cortical prediction error signals, but  
392 this question awaits future experiments.

393           Our study is important because it has revealed the involvement of two basic  
394 mechanisms, i.e., repetition suppression and prediction error; and two different  
395 pathways, lemniscal and non-lemniscal, underlying the neuronal mismatch in the  
396 thalamocortical hierarchy. Accordingly, with the predictive coding theory which  
397 suggest that the brain is constantly trying to minimize the discrepancy between actual  
398 sensory input and internal representations of the environment (4,61). What is new in our  
399 data is the critical importance of the hierarchical organization of the auditory system in  
400 sharing the ‘responsibility’ for generating the representation and detecting the  
401 discrepancy, largely attributable to thalamic and cortical processes. While altering the  
402 balance between the predictive signal and predictive-error signal may underlie the  
403 aberrant perception of psychotic disorders (62), our data provide evidence that the  
404 NMDA-synaptic plasticity and MMN relationship is not as simple as previously  
405 surmised from human studies. Moreover, here we have only tackled the functional role  
406 of the NMDA-R under a particular experimental manipulation and we cannot exclude  
407 the possibility that larger doses of MK-801 would have generated different results. It is  
408 also well known that other neuromodulatory systems such as the dopaminergic,  
409 cholinergic and/or cannabinoid systems maybe altered and interact with the NMDA  
410 receptors in normal brain function (63,64) and schizophrenia patients (50,65–69). Thus,  
411 futures studies of schizophrenia in animal models should also consider these  
412 interactions.

413           What are the implications of our findings for schizophrenia? If a safe drug  
414 were available that targeted the relevant NMDA-R subunit, and facilitated

415 neuroplasticity as indexed by an increased MMN even for a short time period, it offers  
416 opportunities for interventions to remediate cognitive deficits that are a core feature of  
417 schizophrenia (70). Memantine which has been shown to increase MMN amplitude in  
418 healthy individuals and in schizophrenia has been used as an adjunctive therapy in  
419 schizophrenia for some time to improve cognition in particular. While effects of  
420 adjunctive therapy are small, recent meta-analysis suggests that there are improvements  
421 in global measures of cognition, but improvements in more sensitive composite  
422 cognitive test scores were not observed (71). To date, there have been no attempts to  
423 utilize MMN response to memantine as an index of neuroplasticity that could be  
424 exploited in remediation studies. Interestingly, both the moderate affinity antagonist,  
425 memantine, and high affinity antagonist, MK-801, bind to the NR2B subunit of the  
426 NMDA-R at very similar binding locations (72) but only memantine has been approved  
427 for use in humans given evidence of neurotoxic effects of MK-801 in humans (73). One  
428 avenue of future research is the development of safe compounds for human use that  
429 target similar binding locations to memantine and MK-801.

430

## 431 **MATERIAL AND METHODS**

432 Experiments were performed on 48 (control=25; MK-801=23) adult, female Long-  
433 Evans rats with body weights between 200-250g (aged 9 to 15 weeks). All experimental  
434 procedures were performed at the University of Salamanca, and all procedures and  
435 experimental protocols were in accordance with the guidelines of the European  
436 Communities Directive (86/609/EEC, 2003/65/EC and 2010/63/EU) and the RD  
437 53/2013 Spanish legislation for the use and care of animals. All the details of the study

438 were approved by the Bioethics Committee of the University of Salamanca (ref#  
439 USAL-ID-195).

440 **Surgical procedures:** Anesthesia was induced and maintained with urethane (1.5g/kg,  
441 i.p), with supplementary doses (0.5g/kg, i.p) given as needed. Dexamethasone  
442 (0.25mg/kg) and atropine (0.1mg/kg) were administered at the beginning of the surgery  
443 to reduce brain edema and bronchial secretions, respectively. Isotonic glucosaline  
444 solution was administered periodically (5-10ml every 6-8h, s.c) to avoid dehydration.  
445 During all experimental procedures, animals were artificially ventilated, and CO<sub>2</sub> and  
446 temperature monitored (74–77).

447 The initial procedure was the same in each case, and the subsequent procedures differed  
448 only in the craniotomy location, and the placement/orientation for the recording  
449 electrode (animals per group/location: control MGB=16, AC=9; MK-801 MGB=15,  
450 AC=8). For MGB recordings, a craniotomy (~2x2mm, from -5 to -6.5mm bregma and -  
451 3.5mm lateral) was performed in the left parietal bone, dura was removed, and the  
452 electrode advanced in a vertical direction (78). For AC recordings, the skin and muscle  
453 over the left temporal bone was retracted and a 6x5mm craniotomy was performed  
454 (between -2 and -6 from Bregma) over the temporal bone (79) dura was removed and  
455 the area was covered with a thin, transparent layer of agar to prevent desiccation and  
456 stabilize recordings. Electrodes for AC recording were inserted using a triple axis  
457 micromanipulator (Sensapex), forming a 30° angle with the horizontal plane, to  
458 penetrate through all cortical layers of the same cortical column.

459 For this study, animals in MK-801-treated group receive a systemic intraperitoneal  
460 injection (0.1mg/kg) of a noncompetitive NMDA-R antagonist (MK-801 hydrogen  
461 maleate, M107 Sigma-Aldrich). Control animals did not receive any injection.

462 **Electrophysiological recording procedures.** During all procedures, animals were  
463 placed in a stereotaxic frame fixed with hollow specula ear bars that housed the sound  
464 delivery system. One single neuron and local field potential (LFP) was recorded at a  
465 time, using the same tungsten electrode (1-4M $\Omega$ ) inserted into a single auditory station  
466 (MGB or AC) in each individual animal. The signal recorded was pre-amplified (1000x)  
467 and band-pass filtered (1-3kHz) with a medusa preamplifier (TDT). This analog signal  
468 was digitalized 12k sampling rate and further band-pass filtered (TDT-RX6) separately  
469 for spikes (500Hz-3kHz) and LFP (3-50Hz). We used short trains of white noise bursts  
470 (30 ms, 5 ms rise-fall ramps) to search for neuronal activity. To prevent neuronal  
471 adaptation during the search, some parameters (frequency and intensity) and stimulus  
472 type (white noise, pure tone) were manually varied. Once a single neuron was isolated a  
473 frequency-response area (FRA) of the response magnitude for each frequency/intensity  
474 combination was first computed (Figure 1a). A randomized sequence of pure tones  
475 (from 1 to 44 KHz) was presented at a rate of 4Hz, with varying frequency and  
476 intensity, and with 3 repetitions of all tones.

477 For each animal treated with MK-801 the first single neuron was recorded ~15 min after  
478 the drug injection (80). Ten evenly-spaced pure tones (0.5 octaves separation) at a fixed  
479 sound intensity (usually 20-30dB above the threshold) were selected to each neuron  
480 recorded to create the control sequences, cascades and many-standard (9,33), and  
481 additionally, adjacent pairs of them were used to present various oddball sequences

482 (Figure 1b). All sequences were 400 tones in length (75ms duration, 5ms rise-fall ramp  
483 and 250ms interstimulus interval), each tone in the control sequences was played 40  
484 times, with the same overall presentation rate as deviants in the oddball sequence.

485 Oddball sequences were used to test the specific contribution of deviant tones in an  
486 adaptation context. An oddball sequence consisted of a repetitive tone (standard 90%  
487 probability), occasionally replaced by a tone of a different frequency (deviant 10%  
488 probability), in a pseudorandom manner. We used two types of control sequences: the  
489 many-standard and cascade sequences. Both containing the same 10 frequencies but  
490 differing in the order of presentation. The many-standard control was randomly  
491 presented, mimicking the presentation rate and the unpredictability of the deviant tones.  
492 While cascades were played always in the same presentation order, ascending or  
493 descending in frequency. Hence the cascade contains a regularity, mimic the  
494 presentation rate of deviant sounds but in a predictable context and consequently do not  
495 violate a regularity. These four conditions, and by extension responses to them, will be  
496 denoted as deviant (DEV), standard (STD), cascade (CAS) and many-standard. Finally,  
497 if the neuron could be held for long enough, the same protocol was repeated for  
498 different frequencies and/or intensity.

499 **Anatomical location.** For MGB recording localization, at the end of each tract and  
500 experiment, two electrolytic lesions were made to mark the end and the beginning of the  
501 auditory signal (figure 6a). Then, animals were given a lethal dose of sodium  
502 pentobarbital and perfused transcardially with phosphate buffered saline (0.5% NaNO<sub>3</sub>  
503 in Phosphate Buffered Saline) followed by a fixative mix of 1% paraformaldehyde and  
504 1% glutaraldehyde). After fixation and dissection, the brain was cryoprotected in 30%

505 sucrose and sectioned into 40 $\mu$ m slices. Sections were Nissl stained with 0.1% cresyl  
506 violet. Recording sites were marked on images from an adult rat brain atlas (81) and  
507 neurons that were recorded from were assigned to one of the main divisions of the MGB  
508 (dorsal, medial or ventral). This information was complemented and confirmed by the  
509 stereotaxic coordinates as well as the depth of the neuron within a tract.

510 For the AC experiments, a magnified picture (25x) of the exposed cortex and the  
511 Bregma references was taken at the end of the surgery with a digital single lens reflex  
512 camera (D5100, Nikon) coupled to the surgical microscope (Zeiss). The picture was  
513 overlapped to guide and mark each electrode placement into a micrometric grid (250-  
514 500  $\mu$ m spacing; figure 6b). Then we performed several tracts recording multi-unit  
515 activity frequency response area (FRA), the characteristic frequency arise from each  
516 FRA was placed over the picture, resulting in a characteristic frequency map of each  
517 animal. Boundaries were identify following the changes in the tonotopic gradient: high-  
518 frequency reversal between the ventral and anterior auditory fields (rostrally), low-  
519 frequency reversal between primary and posterior auditory field (dorsocaudally) and  
520 high-frequency reversal between ventral and suprarhinal auditory field (ventrally) (79).  
521 Then, each recording was located in one of these five fields. Nevertheless, the map was  
522 complemented during all electrophysiological recording session with the characteristic  
523 frequency of each new tract.

524

525 **Statistical analysis.** All the data analyses were performed with Matlab<sup>TM</sup> software,  
526 using the built-in functions, the Statistics and Machine Learning toolbox, or custom  
527 scripts and functions developed in our laboratory. To test for significant excitatory

528 responses to tones we used a Monte Carlo approach, simulating 1000 peri-stimulus time  
529 histogram (PSTH) using a Poisson model with a constant firing rate equal to the  
530 spontaneous firing rate. A null distribution of baseline-corrected spike counts was  
531 generated from this collection of PSTH. Lastly, the  $p$  value of the baseline-corrected  
532 spike count was empirically computed as  $p = (g+ 1)/(N+ 1)$ , where  $g$  is the count of null  
533 measures greater than or equal to baseline-corrected spike count, and  $N=1000$  is the size  
534 of the null sample. Finally, we only included in the analysis neuron/frequency  
535 combinations with significant excitatory response ( $p > 0.05$ ) after the baseline-corrected  
536 spike count to at least one of the conditions (DEV, STD, CAS). PSTH were used to  
537 estimate the spike-density function (SDF) over the time, showing action potential  
538 density over time (in action potentials per second) from  $-75$  to  $250$ ms around stimulus  
539 onset, for the 40 trials available for each tone and condition (DEV, STD, CAS),  
540 smoothed with a 6ms gaussian kernel (“ksdensity” function in Matlab) in 1ms steps.  
541 The baseline spontaneous firing rate was determined as the average firing rate during  
542 the 75ms preceding stimulus onset.

543 The excitatory response was measured as the area below the SDF and above the  
544 baseline spontaneous firing rate, between 0 and 180ms after stimulus onset (positive  
545 area patches only, to avoid negative response values). This measure will be referred to  
546 as “baseline-corrected spike count”.

547 Baseline-corrected spike count responses of a neuron to the same tone in the three  
548 conditions (DEV, STD, CAS) were normalized using the formulas:

549  $DEV_{\text{Normalized}} = DEV/N;$

550  $STD_{\text{Normalized}} = STD/N;$



551  $CAS_{\text{Normalized}} = CAS/N;$

552 Where  $N = \sqrt{DEV^2 + STD^2 + CAS^2}$ , is the Euclidean norm of the vector (DEV, STD,  
553 CAS) defined by the three responses. Normalized values were the coordinates of a 3D  
554 unit vector ( $DEV_{\text{Normalized}}$ ,  $STD_{\text{Normalized}}$ ,  $CAS_{\text{Normalized}}$ ) with the same direction of the  
555 original vector (DEV, STD, CAS), and thus the same proportions between the three  
556 response measures. This normalization procedure always results in a value ranging 0–1,  
557 and has a straightforward geometrical interpretation.

558 From these normalized responses, indices of neuronal mismatch (iMM), repetition  
559 suppression (iRS), and prediction error (iPE) were computed as:

560  $iMM = DEV_{\text{Normalized}} - STD_{\text{Normalized}};$

561  $iPE = DEV_{\text{Normalized}} - CAS_{\text{Normalized}};$

562  $iRS = CAS_{\text{Normalized}} - STD_{\text{Normalized}};$

563 These indices, consequently, always range between –1 and 1, and provide the  
564 following quantitative decomposition of neuronal mismatch into repetition suppression  
565 and prediction error:  $iMM = iRS + iPE$ . To test these indices over time, we divided the  
566 whole response into 12 time windows, 20ms width, from -50 to 190ms with respect to  
567 the stimulus onset. Then, we compared each time window against zero using a sign-rank  
568 test, false discovery rate (FDR=0.1) corrected for the 12 windows.

569 For the analysis of the LFP signal, we aligned the recorded wave to the onset of the  
570 stimulus for every trial, and computed the mean LFP for every recording site and  
571 stimulus condition (DEV-LFP, STD-LFP and CTR-LFP), as well as the differences

572 between them, resulting in the three LFP-indices: “neuronal mismatch” (MM-LFP =  
573 DEV-LFP – STD-LFP), “prediction error” (PE-LFP = DEV-LFP – CAS-LFP) and  
574 “repetition suppression” (RS-LFP = CAS-LFP – STD-LFP). Then, grand-averages were  
575 computed for all conditions and auditory station separately. The  $p$  value of the grand-  
576 averaged for the three LFP-indices (MM-LFP, PE-LFP and RS-LFP) was determined  
577 for every time point with a two-tailed  $t$  test (FDR corrected).

578 Our data set was not normally distributed, so we used distribution-free (non-  
579 parametric) tests. These included the Wilcoxon signed-rank test and Friedman test (for  
580 baseline-corrected spike counts, normalized responses, indices of neuronal mismatch,  
581 repetition suppression and prediction error). Only the difference wave for the LFPs was  
582 tested using a  $t$ -test, since each LFP trace is itself an average of 40 waves. For multiple  
583 comparison tests,  $p$  values were FDR corrected using the Benjamini-Hochberg method.  
584 Linear models were used to test for significant average iMM, iPE and iRS within each  
585 auditory station. Significant effects of station, pathway, and interactions between them  
586 were fitted using the ‘fitlm’ function in Matlab, with robust options. To estimate final  
587 sample sizes required for the observed effects after the initial exploratory experiments,  
588 we used the ‘sampsizewr’ function in Matlab adjusted for the iPE for each region, to  
589 obtain a statistical power of 0.8 for this index. Sample sizes were enlarged with  
590 additional experiments until they were just greater than the minimum required (number  
591 of points recorded, and the minimum required for each station; see Table 1).

592 To analyze the time course of adaptation we computed an averaged time course for all  
593 the standard stimuli presented. Then, we fitted a power law function with a three  
594 parameters model,  $y(t)=a \cdot t^b+c$ , where  $a$  indicates the responses beginning or the first

595 spike strength;  $b$  the sensitivity to repetitive stimuli, or the adaptation velocity, and  $c$  the  
596 steady-state response.  $R^2$  values indicated that the model fits very well for standard  
597 responses in both groups, explaining between 60% and 78% of the response variability  
598 within all regions.

599 To analyze spikes differences between MK-801 and control group we computed the  
600 median values for each condition tested (DEV, STD and CAS) and their differences  
601 (iMM, iRS and iPE) and calculated a ranksum test. To compare each time window  
602 between groups a two-sample  $t$ -test (from 0 to 200ms, Bonferroni corrected for 200  
603 comparisons with family-wise error rate  $\text{FWER} < 0.05$ ) was used for the SDF and LFPs  
604 to each stimulus condition and indices, using the 'ttest2' function in Matlab, for every  
605 time point.

606 **Data availability.** The data that support the findings of this study are available from the  
607 corresponding author on reasonable request.

608

## 609 **Acknowledgements**

610 We thank Drs. Javier Nieto-Diego and David Perez-Gonzalez for their technical support  
611 and constructive criticisms; and Nashat Abumaria and Juanita Todd for advice and  
612 constructive comments on the discussion. We also thank Ms. Marianny Janiree Pernía  
613 Rosales for helping with the histological photomicrography and Mr. Antonio Rivas  
614 Cornejo for the technical support.

615 **Funding**

616 Financial support was kindly provided by the Spanish MINECO (SAF2016-75803-P)  
617 and JCYL (SA023P17) to MSM. GGP held a fellowship from the Spanish MINECO  
618 (BES-2014-069113) and CVB held a fellowship from Mexican CONACyT (216652).  
619 LH was supported by an NHMRC project grant: APP1109283.

620

621 **Competing interest.**

622 The authors report no competing interests.

623

624 **REFERENCES**

- 625 1. Näätänen R, Gaillard AWKWK, Mäntysalo S. Early selective-attention effect on  
626 evoked potential reinterpreted. *Acta Psychol (Amst)*. 1978 Jul 1;42(4):313–29.
- 627 2. Randeniya R, Oestreich LKL, Garrido MI. Sensory prediction errors in the  
628 continuum of psychosis. *Schizophr Res*. 2018 Jan 1;191:109–22.
- 629 3. Carbajal G V, Malmierca MS. The Neuronal Basis of Predictive Coding Along  
630 the Auditory Pathway: From the Subcortical Roots to Cortical Deviance  
631 Detection. Vol. 22, *Trends in Hearing*. SAGE Publications; 2018. p.  
632 2331216518784822.
- 633 4. Friston K. A theory of cortical responses. *Philos Trans R Soc B Biol Sci*.  
634 2005;360(1456):815–36.
- 635 5. Garrido MI, Kilner JM, Stephan KE, Friston KJ. The mismatch negativity: A

- 636 review of underlying mechanisms. *Clin Neurophysiol.* 2009 Mar 1;120(3):453–  
637 63.
- 638 6. Michie PT, Malmierca MS, Harms L, Todd J. Understanding the neurobiology of  
639 MMN and its reduction in schizophrenia. *Biol Psychol.* 2016 Apr 1;116:1–3.
- 640 7. Wacongne C. A predictive coding account of MMN reduction in schizophrenia.  
641 *Biol Psychol.* 2016;116:68–74.
- 642 8. Bendixen A, Roeber U, Schröger E. Regularity extraction and application in  
643 dynamic auditory stimulus sequences. *J Cogn Neurosci.* 2007 Oct  
644 13;19(10):1664–77.
- 645 9. Parras GG, Nieto-Diego J, Carbajal G V., Valdés-Baizabal C, Escera C,  
646 Malmierca MS. Neurons along the auditory pathway exhibit a hierarchical  
647 organization of prediction error. *Nat Commun.* 2017 Dec 15;8(1):2148.
- 648 10. Harms L, Fulham WR, Todd J, Budd TW, Hunter M, Meehan C, et al. Mismatch  
649 negativity (MMN) in freely-moving rats with several experimental controls.  
650 *PLoS One.* 2014;9(10):e110892.
- 651 11. Kurkela JLO, Lipponen A, Kyläheiko I, Astikainen P. Electrophysiological  
652 evidence of memory-based detection of auditory regularity violations in  
653 anesthetized mice. *Sci Rep.* 2018 Feb 14;8(1):3027.
- 654 12. Nakamura T, Michie PT, Fulham WR, Todd J, Budd TW, Schall U, et al.  
655 Epidural Auditory Event-Related Potentials in the Rat to Frequency and duration  
656 Deviants: Evidence of Mismatch Negativity? *Front Psychol.* 2011;2:367.
- 657 13. Carbajal G, Malmierca MS. The unique role of the non-lemniscal pathway on

- 658 stimulus-specific adaptation ( SSA ) in the auditory system. Proceedings Int Symp  
659 Audit Audiol Res. 2018;6(February).
- 660 14. Bodatsch M, Brockhaus-Dumke A, Klosterkötter J, Ruhrmann S. Forecasting  
661 Psychosis by Event-Related Potentials—Systematic Review and Specific Meta-  
662 Analysis. *Biol Psychiatry*. 2015 Jun 1;77(11):951–8.
- 663 15. Erickson MA, Ruffle A, Gold JM. A Meta-Analysis of Mismatch Negativity in  
664 Schizophrenia: From Clinical Risk to Disease Specificity and Progression. *Biol*  
665 *Psychiatry*. 2016;79(12):980–7.
- 666 16. Umbricht D, Krljes S. Mismatch negativity in schizophrenia: a meta-analysis.  
667 *Schizophr Res*. 2005 Jul 1;76(1):1–23.
- 668 17. Light GA, Braff DL. Mismatch negativity deficits are associated with poor  
669 functioning in schizophrenia patients. *Arch Gen Psychiatry*. 2005 Feb  
670 1;62(2):127–36.
- 671 18. Rasser PE, Schall U, Todd J, Michie PT, Ward PB, Johnston P, et al. Gray matter  
672 deficits, mismatch negativity, and outcomes in schizophrenia. *Schizophr Bull*.  
673 2011 Jan;37(1):131–40.
- 674 19. Light GA, Swerdlow NR. Future clinical uses of neurophysiological biomarkers  
675 to predict and monitor treatment response for schizophrenia. *Ann N Y Acad Sci*.  
676 2015 May;1344(1):105–19.
- 677 20. Krystal JH, Perry EB, Gueorguieva R, Belger A, Madonick SH, Abi-Dargham A,  
678 et al. Comparative and interactive human psychopharmacologic effects of  
679 ketamine and amphetamine: Implications for glutamatergic and dopaminergic

- 680 model psychoses and cognitive function. *Arch Gen Psychiatry*. 2005 Sep  
681 1;62(9):985–95.
- 682 21. Todd J, Harms L, Schal I U, Michie PT. Mismatch negativity: Translating the  
683 potential. Vol. 4, *Frontiers in Psychiatry*. Frontiers; 2013. p. 171.
- 684 22. Javitt DC, Steinschneider M, Schroeder CE, Arezzo JC. Role of cortical N-  
685 methyl-D-aspartate receptors in auditory sensory memory and mismatch  
686 negativity generation: implications for schizophrenia. *Proc Natl Acad Sci U S A*.  
687 1996;93(21):11962–7.
- 688 23. Featherstone RE, Melnychenko O, Siegel SJ. Mismatch negativity in preclinical  
689 models of schizophrenia. *Schizophr Res*. 2018 Jan 1;191:35–42.
- 690 24. Mouri A, Noda Y, Enomoto T, Nabeshima T. Phencyclidine animal models of  
691 schizophrenia: Approaches from abnormality of glutamatergic neurotransmission  
692 and neurodevelopment. *Neurochem Int*. 2007 Jul 1;51(2–4):173–84.
- 693 25. Harms L. Mismatch responses and deviance detection in N-methyl-D-aspartate  
694 (NMDA) receptor hypofunction and developmental models of schizophrenia.  
695 *Biol Psychol*. 2016 Apr 1;116:75–81.
- 696 26. Siegel SJ, Talpos JC, Geyer MA. Animal models and measures of perceptual  
697 processing in schizophrenia. *Neurosci Biobehav Rev*. 2013 Nov;37(9 Pt  
698 B):2092–8.
- 699 27. Ehrlichman RS, Maxwell CR, Majumdar S, Siegel SJ. Deviance-elicited changes  
700 in event-related potentials are attenuated by ketamine in mice. *J Cogn Neurosci*.  
701 2008 Aug;20(8):1403–14.

- 702 28. Sivarao D V, Chen P, Yang Y, Li Y-W, Pieschl R, Ahlijanian MK. NR2B  
703 Antagonist CP-101,606 Abolishes Pitch-Mediated Deviance Detection in Awake  
704 Rats. *Front psychiatry*. 2014;5:96.
- 705 29. Tikhonravov D, Neuvonen T, Pertovaara A, Savioja K, Ruusuvirta T, Näätänen  
706 R, et al. Effects of an NMDA-receptor antagonist MK-801 on an MMN-like  
707 response recorded in anesthetized rats. *Brain Res*. 2008;1203(Haartmaninkatu  
708 8):97–102.
- 709 30. Tikhonravov D, Neuvonen T, Pertovaara A, Savioja K, Ruusuvirta T, Näätänen  
710 R, et al. Dose-related effects of memantine on a mismatch negativity-like  
711 response in anesthetized rats. *Neuroscience*. 2010 Jun 2;167(4):1175–82.
- 712 31. Harms L, Fulham WR, Todd J, Meehan C, Schall U, Hodgson DM, et al. Late  
713 deviance detection in rats is reduced, while early deviance detection is  
714 augmented by the NMDA receptor antagonist MK-801. *Schizophr Res*. 2018 Jan  
715 1;191:43–50.
- 716 32. Opitz B, Schröger E, von Cramon DY. Sensory and cognitive mechanisms for  
717 preattentive change detection in auditory cortex. *Eur J Neurosci*. 2005 Jan  
718 1;21(2):531–5.
- 719 33. Ruhnau P, Herrmann B, Schröger E. Clinical Neurophysiology Finding the right  
720 control : The mismatch negativity under investigation. *Clin Neurophysiol*.  
721 2012;123(3):507–12.
- 722 34. Blanke ML, VanDongen AMJ. Activation Mechanisms of the NMDA Receptor  
723 (Chapter 13). *Biology of the NMDA Receptor*. CRC Press/Taylor & Francis;



- 724 2009. 283-312 p.
- 725 35. Aukstulewicz R, Friston K. Repetition suppression and its contextual  
726 determinants in predictive coding. *Cortex*. 2016;80:125–40.
- 727 36. Näätänen R, Paavilainen P, Rinne T, Alho K. The mismatch negativity (MMN)  
728 in basic research of central auditory processing: A review. *Clin Neurophysiol*.  
729 2007 Dec 1;118(12):2544–90.
- 730 37. Schuelert N, Dorner-Ciossek C, Brendel M, Rosenbrock H. A comprehensive  
731 analysis of auditory event-related potentials and network oscillations in an  
732 NMDA receptor antagonist mouse model using a novel wireless recording  
733 technology. *Physiol Rep*. 2018 Aug;6(16):e13782.
- 734 38. Ahnaou A, Huysmans H, Biermans R, Manyakov N V., Drinkenburg WHIM.  
735 Ketamine: differential neurophysiological dynamics in functional networks in the  
736 rat brain. *Transl Psychiatry*. 2017;7(9):e1237.
- 737 39. Oranje B, Berckel B van, Kemner C, Ree J van, Kahn R, Verbaten M. The  
738 Effects of a Sub-Anaesthetic Dose of Ketamine on Human Selective Attention.  
739 *Neuropsychopharmacology*. 2000 Mar 1;22(3):293–302.
- 740 40. Andine P, Widermark N, Axelsson R, Nyberg G, Olofsson U, Martensson E, et  
741 al. Characterization of MK-801-Induced Behavior as a Putative Rat Model of  
742 Psychosis. *J Pharmacol Exp Ther*. 1999;290(3):1393–408.
- 743 41. Meehan C, Harms L, Frost JD, Barreto R, Todd J, Schall U, et al. Effects of  
744 immune activation during early or late gestation on schizophrenia-related  
745 behaviour in adult rat offspring. *Brain Behav Immun*. 2017 Jul 1;63:8–20.

- 746 42. Korostenskaja M, Nikulin V V., Kičić D, Nikulina A V., Kähkönen S. Effects of  
747 NMDA receptor antagonist memantine on mismatch negativity. *Brain Res Bull.*  
748 2007 May 30;72(4–6):275–83.
- 749 43. Swerdlow NR, Bhakta S, Chou H-H, Talledo JA, Balvaneda B, Light GA.  
750 Memantine Effects On Sensorimotor Gating and Mismatch Negativity in Patients  
751 with Chronic Psychosis. *Neuropsychopharmacology.* 2016 Jan;41(2):419–30.
- 752 44. Slutsky I, Sadeghpour S, Li B, Liu G. Enhancement of Synaptic Plasticity  
753 through Chronically Reduced Ca<sup>2+</sup> Flux during Uncorrelated Activity. *Neuron.*  
754 2004 Dec 2;44(5):835–49.
- 755 45. Abumaria N, Yin B, Zhang L, Li X-Y, Chen T, Descalzi G, et al. Effects of  
756 elevation of brain magnesium on fear conditioning, fear extinction, and synaptic  
757 plasticity in the infralimbic prefrontal cortex and lateral amygdala. *J Neurosci.*  
758 2011 Oct 19;31(42):14871–81.
- 759 46. Slutsky I, Abumaria N, Wu L-J, Huang C, Zhang L, Li B, et al. Enhancement of  
760 Learning and Memory by Elevating Brain Magnesium. *Neuron.* 2010 Jan  
761 28;65(2):165–77.
- 762 47. DeBiasi S, Minelli A, Melone M, Conti F, DeBiasi, S., Minelli, A., Melone, M.,  
763 & Conti F. Presynaptic NMDA receptors in the neocortex are both auto- and  
764 heteroreceptors. *Neuroreport.* 1996 Nov;7(15–17):2773–6.
- 765 48. Homayoun H, Moghaddam B. NMDA Receptor Hypofunction Produces  
766 Opposite Effects on Prefrontal Cortex Interneurons and Pyramidal Neurons. *J*  
767 *Neurosci.* 2007 Oct 24;27(43):11496–500.

- 768 49. Javitt D, Lee M, Kantrowitz J, Martinez A. Mismatch negativity as a biomarker  
769 of theta band oscillatory dysfunction in schizophrenia. *Schizophr Res.*  
770 2018;191(2016):51–60.
- 771 50. Okada M, Fukuyama K, Kawano Y, Shiroyama T, Ueda Y. Memantine protects  
772 thalamocortical hyper-glutamatergic transmission induced by NMDA receptor  
773 antagonism via activation of system xc. *Pharmacol Res Perspect.* 2019  
774 Feb;7(1):e00457.
- 775 51. Bygrave AM, Masiulis S, Nicholson E, Berkemann M, Barkus C, Sprengel R, et  
776 al. Knockout of NMDA-receptors from parvalbumin interneurons sensitizes to  
777 schizophrenia-related deficits induced by MK-801. *Transl Psychiatry.* 2016 Apr  
778 12;6(4):e778.
- 779 52. Chen I-WI-W, Helmchen F, Lutcke H. Specific Early and Late Oddball-Evoked  
780 Responses in Excitatory and Inhibitory Neurons of Mouse Auditory Cortex. *J*  
781 *Neurosci.* 2015 Sep 9;35(36):12560–73.
- 782 53. Natan RG, Briguglio JJ, Mwilambwe-Tshilobo L, Jones SI, Aizenberg M,  
783 Goldberg EM, et al. Complementary control of sensory adaptation by two types  
784 of cortical interneurons. *Elife.* 2015 Oct 13;4.
- 785 54. Malmierca MS. The Structure and Physiology of the Rat Auditory System: An  
786 Overview. In 2003. p. 147–211.
- 787 55. Winer JA, Kelly JB, Larue DT. Neural architecture of the rat medial geniculate  
788 body. *Hear Res.* 1999 Apr 1;130(1–2):19–41.
- 789 56. Bartlett EL. The organization and physiology of the auditory thalamus and its

- 790           role in processing acoustic features important for speech perception. *Brain Lang.*  
791           2013 Jul;126(1):29–48.
- 792   57.   Crabtree JW, Lodge D, Bashir ZI, Isaac JTR. GABAA, NMDA and mGlu2  
793           receptors tonically regulate inhibition and excitation in the thalamic reticular  
794           nucleus. *Eur J Neurosci.* 2013 Mar;37(6):850–9.
- 795   58.   Yu X, Xu X, He S, He J. Change detection by thalamic reticular neurons. *Nat*  
796           *Neurosci.* 2009 Sep 16;12(9):1165–70.
- 797   59.   Hu H, Agmon A. Differential Excitation of Distally versus Proximally Targeting  
798           Cortical Interneurons by Unitary Thalamocortical Bursts. *J Neurosci.*  
799           2016;36(26):6906–16.
- 800   60.   Musall S, von der Behrens W, Mayrhofer JM, Weber B, Helmchen F, Haiss F.  
801           Tactile frequency discrimination is enhanced by circumventing neocortical  
802           adaptation. *Nat Neurosci.* 2014 Nov 21;17(11):1567–73.
- 803   61.   Rauss K, Pourtois G. What is Bottom-Up and What is Top-Down in Predictive  
804           Coding? *Front Psychol.* 2013;4:276.
- 805   62.   Sterzer P, Adams RA, Fletcher P, Frith C, Lawrie SM, Muckli L, et al. The  
806           Predictive Coding Account of Psychosis. 2018;
- 807   63.   Ayala YA, Pérez-González D, Malmierca MS. Stimulus-specific adaptation in  
808           the inferior colliculus: The role of excitatory, inhibitory and modulatory inputs.  
809           *Biol Psychol.* 2016;116:10–22.
- 810   64.   Valdés-Baizabal C, Parras GG, Ayala YA, Malmierca MS. Endocannabinoid  
811           Modulation of Stimulus-Specific Adaptation in Inferior Colliculus Neurons of

- 812 the Rat. Sci Rep. 2017;7(1):1–14.
- 813 65. Coyle JT, Balu D, Benneyworth M, Basu A, Roseman A. Beyond the dopamine  
814 receptor: novel therapeutic targets for treating schizophrenia. *Dialogues Clin*  
815 *Neurosci.* 2010;12(3):359–82.
- 816 66. Howes OH, Kaar SJ. Antipsychotic drugs: challenges and future directions.  
817 *World Psychiatry.* 2018 Jun;17(2):170–1.
- 818 67. Lucatch AM, Coles AS, Hill KP, George TP. Cannabis and Mood Disorders.  
819 *Curr Addict Reports.* 2018 Sep 10;5(3):336–45.
- 820 68. Musty R., Deyo R., Baer J., Darrow S., Coleman B. Effects of SR141716 on  
821 animal models of schizophrenia. In *Symposium Cannabinoids, Int Cannabinoid*  
822 *Res Soc Burlington, Vermont.* 2000;
- 823 69. Parr T, Friston KJ. The Anatomy of Inference: Generative Models and Brain  
824 Structure. *Front Comput Neurosci.* 2018;12:90.
- 825 70. Green MF, Kern RS, Braff DL, Mintz J. Neurocognitive deficits and functional  
826 outcome in schizophrenia: are we measuring the “right stuff”?  
827 *Schizophr Bull.* 2000;26(1):119–36.
- 828 71. Kishi T, Ikuta T, Oya K, Matsunaga S, Matsuda Y, Iwata N. Anti-dementia  
829 Drugs for Psychopathology and Cognitive Impairment in Schizophrenia: A  
830 Systematic Review and Meta-analysis. *Int J Neuropsychopharmacol.* 2018 May  
831 14;21(8):748.
- 832 72. Song X, Jensen MØ, Jogini V, Stein RA, Lee C-H, Mchaourab HS, et al.  
833 Mechanism of NMDA receptor channel block by MK-801 and memantine.

- 834 Nature. 2018 Apr 18;556(7702):515–9.
- 835 73. Olney J, Labruyere J, Price M. Pathological changes induced in cerebrocortical  
836 neurons by phencyclidine and related drugs. *Science* (80- ). 1989 Apr  
837 15;244(4910):1360–2.
- 838 74. Ayala YA, Malmierca MS. Cholinergic Modulation of Stimulus-Specific  
839 Adaptation in the Inferior Colliculus. *J Neurosci*. 2015;35(35):12261–72.
- 840 75. Duque D, Malmierca MS. Stimulus-specific adaptation in the inferior colliculus  
841 of the mouse: anesthesia and spontaneous activity effects. *Brain Struct Funct*.  
842 2015 Nov 13;220(6):3385–98.
- 843 76. Duque D, Wang X, Nieto-Diego J, Krumbholz K, Malmierca MS. Neurons in the  
844 inferior colliculus of the rat show stimulus-specific adaptation for frequency, but  
845 not for intensity. *Sci Rep*. 2016 Apr 12;6:24114.
- 846 77. Pérez-González D, Hernández O, Covey E, Malmierca MS. GABA A-mediated  
847 inhibition modulates stimulus-specific adaptation in the inferior colliculus. *PLoS*  
848 *One*. 2012;7(3).
- 849 78. Antunes FM, Nelken I, Covey E, Malmierca MS. Stimulus-Specific Adaptation  
850 in the Auditory Thalamus of the Anesthetized Rat. *PLoS One*. 2010 Nov  
851 19;5(11):e14071.
- 852 79. Nieto-Diego J, Malmierca MS. Topographic Distribution of Stimulus-Specific  
853 Adaptation across Auditory Cortical Fields in the Anesthetized Rat. Zatorre R,  
854 editor. *PLOS Biol*. 2016 Mar 7;14(3):e1002397.
- 855 80. Vezzani A, Serafini R, Stasi MA, Caccia S, Conti I, Tridico R V, et al. Kinetics

856 of MK-801 and its effect on quinolinic acid-induced seizures and neurotoxicity in  
857 rats. *J Pharmacol Exp Ther.* 1989 Apr 1;249(1):278–83.

858 81. Paxinos G, Watson C. *The Rat Brain in Stereotaxic Coordinates* : Hard Cover  
859 Edition. Elsevier Science; 2013. 466 p.

860

a) Frequency Response Example

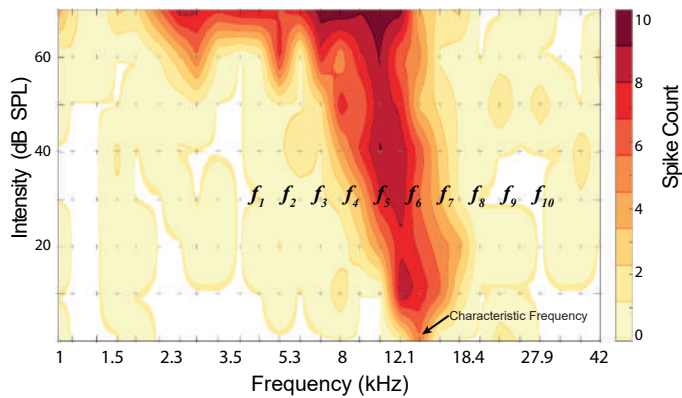

c)

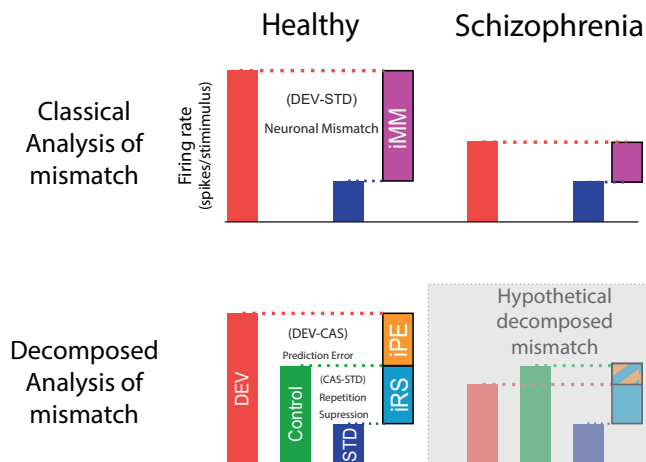

b) Paradigms

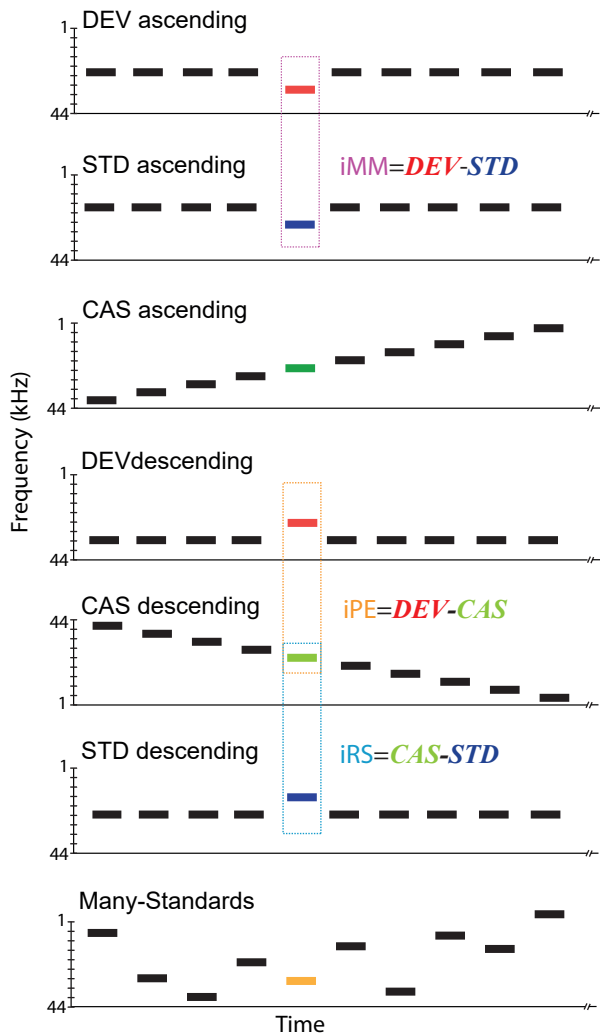



**Figure 1. Experimental design.** **a)** Frequency response area example, with a representation of the ten selected tones to build the experimental paradigms. **b)** Stimulation sequences, the same tone could be presented in different experimental paradigms, thus we can compare same tone in different contexts to control adaptation and deviance detection; and conform the indices of neuronal mismatch (iMM), prediction error (iPE) and repetition suppression (iRS). Note that ascending and descending tones will be compared to the control ascending or descending, respectively. **c)** Sketch of summary results of mismatch responses for healthy and schizophrenia subjects under the classical analysis of mismatch. Second row decomposition of neuronal mismatch, under the assumption of predictive coding framework in healthy subjects, and the hypothetical decomposition of neuronal mismatch into prediction error and repetition suppression in schizophrenia.

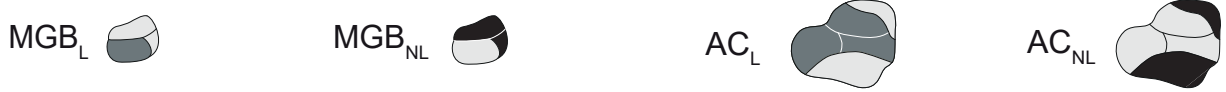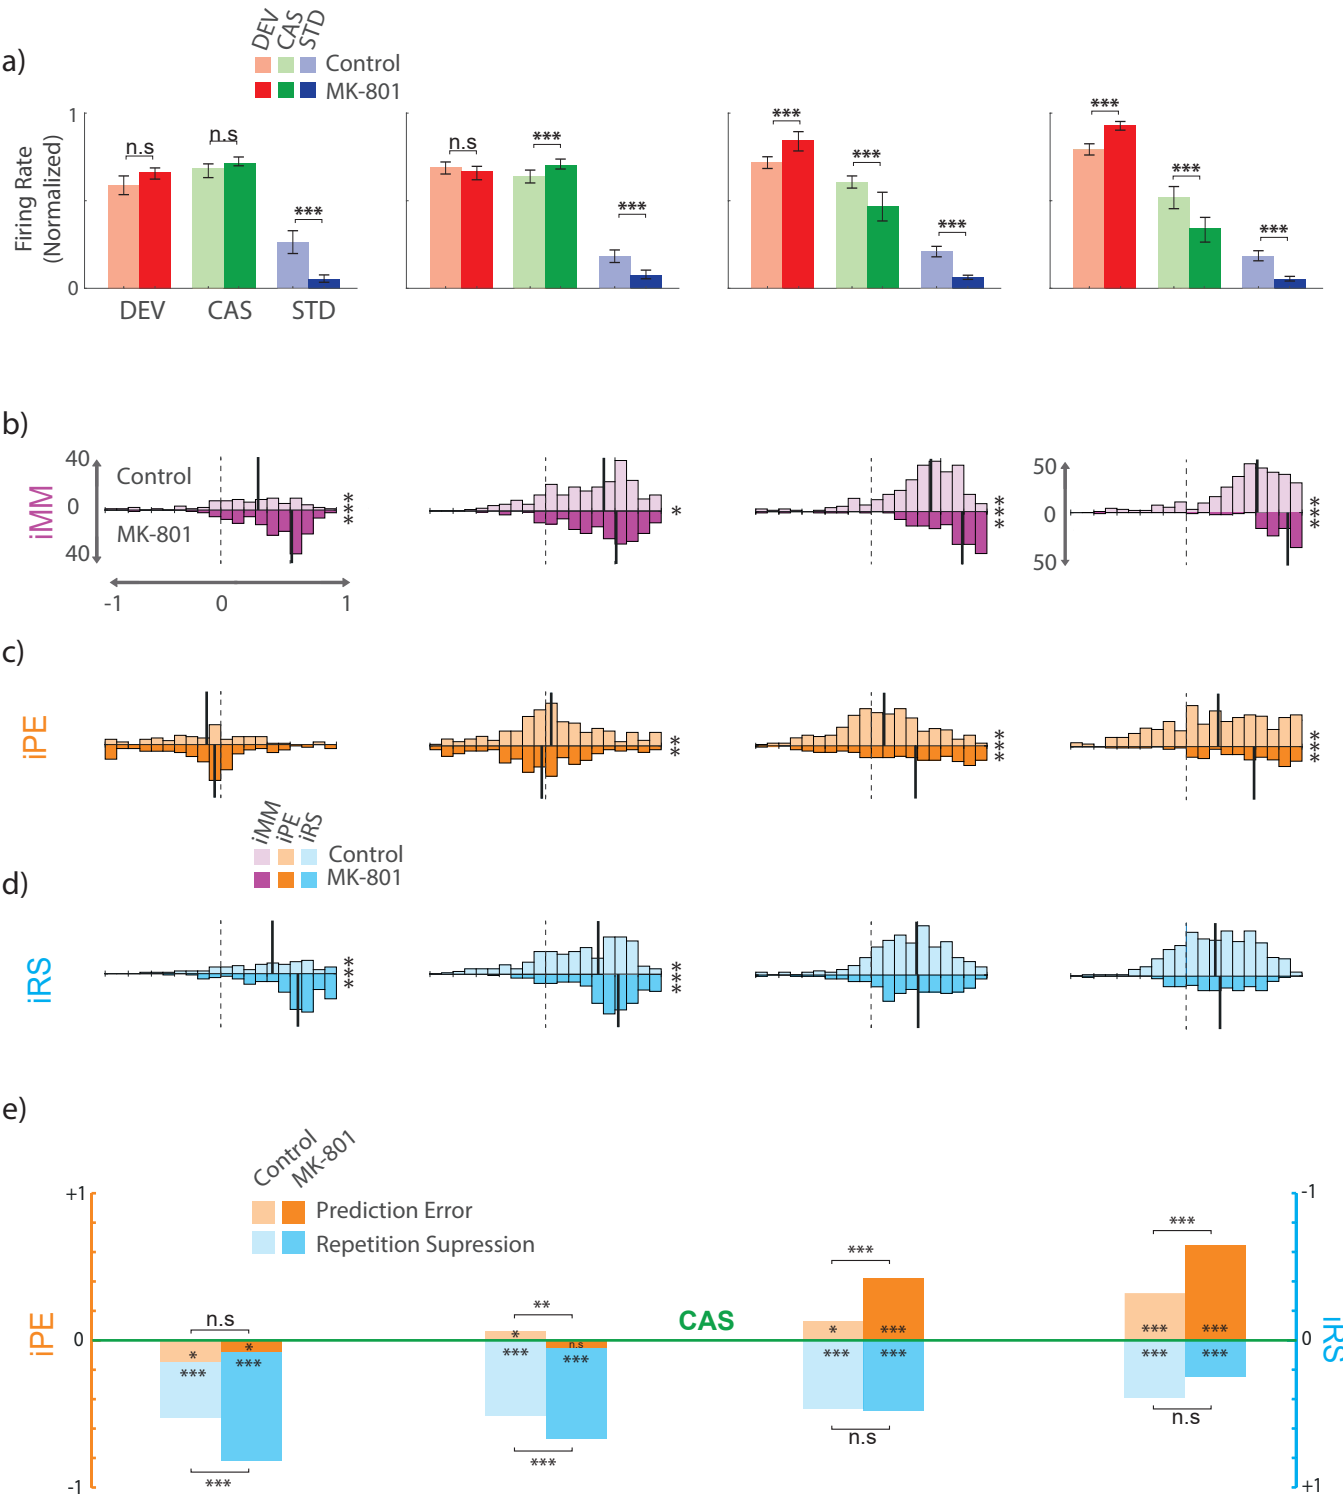

**Figure 2. Single neuron spikes population analysis.** Results for firing rate analysis and their computed differences along the thalamocortical axis. **a)** Boxplot of median normalized responses for deviants (red), cascade (green) and standard (blue) for each group, control (light colors) and MK801 (bright colors), within each station and the statistical significance between groups (Wilcoxon signed-rank test, \*  $p < 0.05$ , \*\*  $p < 0.001$ , \*\*\*  $p < 0.000$ ). **b-d)** Indices histograms displayed in a mirror-like manner for the two groups (controls upper and in light colors; MK801 under and in bright colors), showing the distribution of the three indexes for each neuronal response (ranging between -1 and +1, dotted lines indicate index=0). Vertical solid lines indicate their medians and the significant difference between groups is noted at the right of each histogram block. **e)** Median indices of Prediction Error (orange) and **d)** Repetition Suppression (blue), represented with respect to the baseline set by the cascade control (green line). Thereby, iPE upwards-positive while iRS is downwards-positive. Each median index corresponds to differences between normalized responses in a). Asterisks inside bars denote statistically significance of these indices against zero (Friedman test), while asterisks outside bars denote statistically significance between groups (Wilcoxon signed-rank test, \*  $p < 0.05$ , \*\*  $p < 0.001$ , \*\*\*  $p < 0.000$ ).

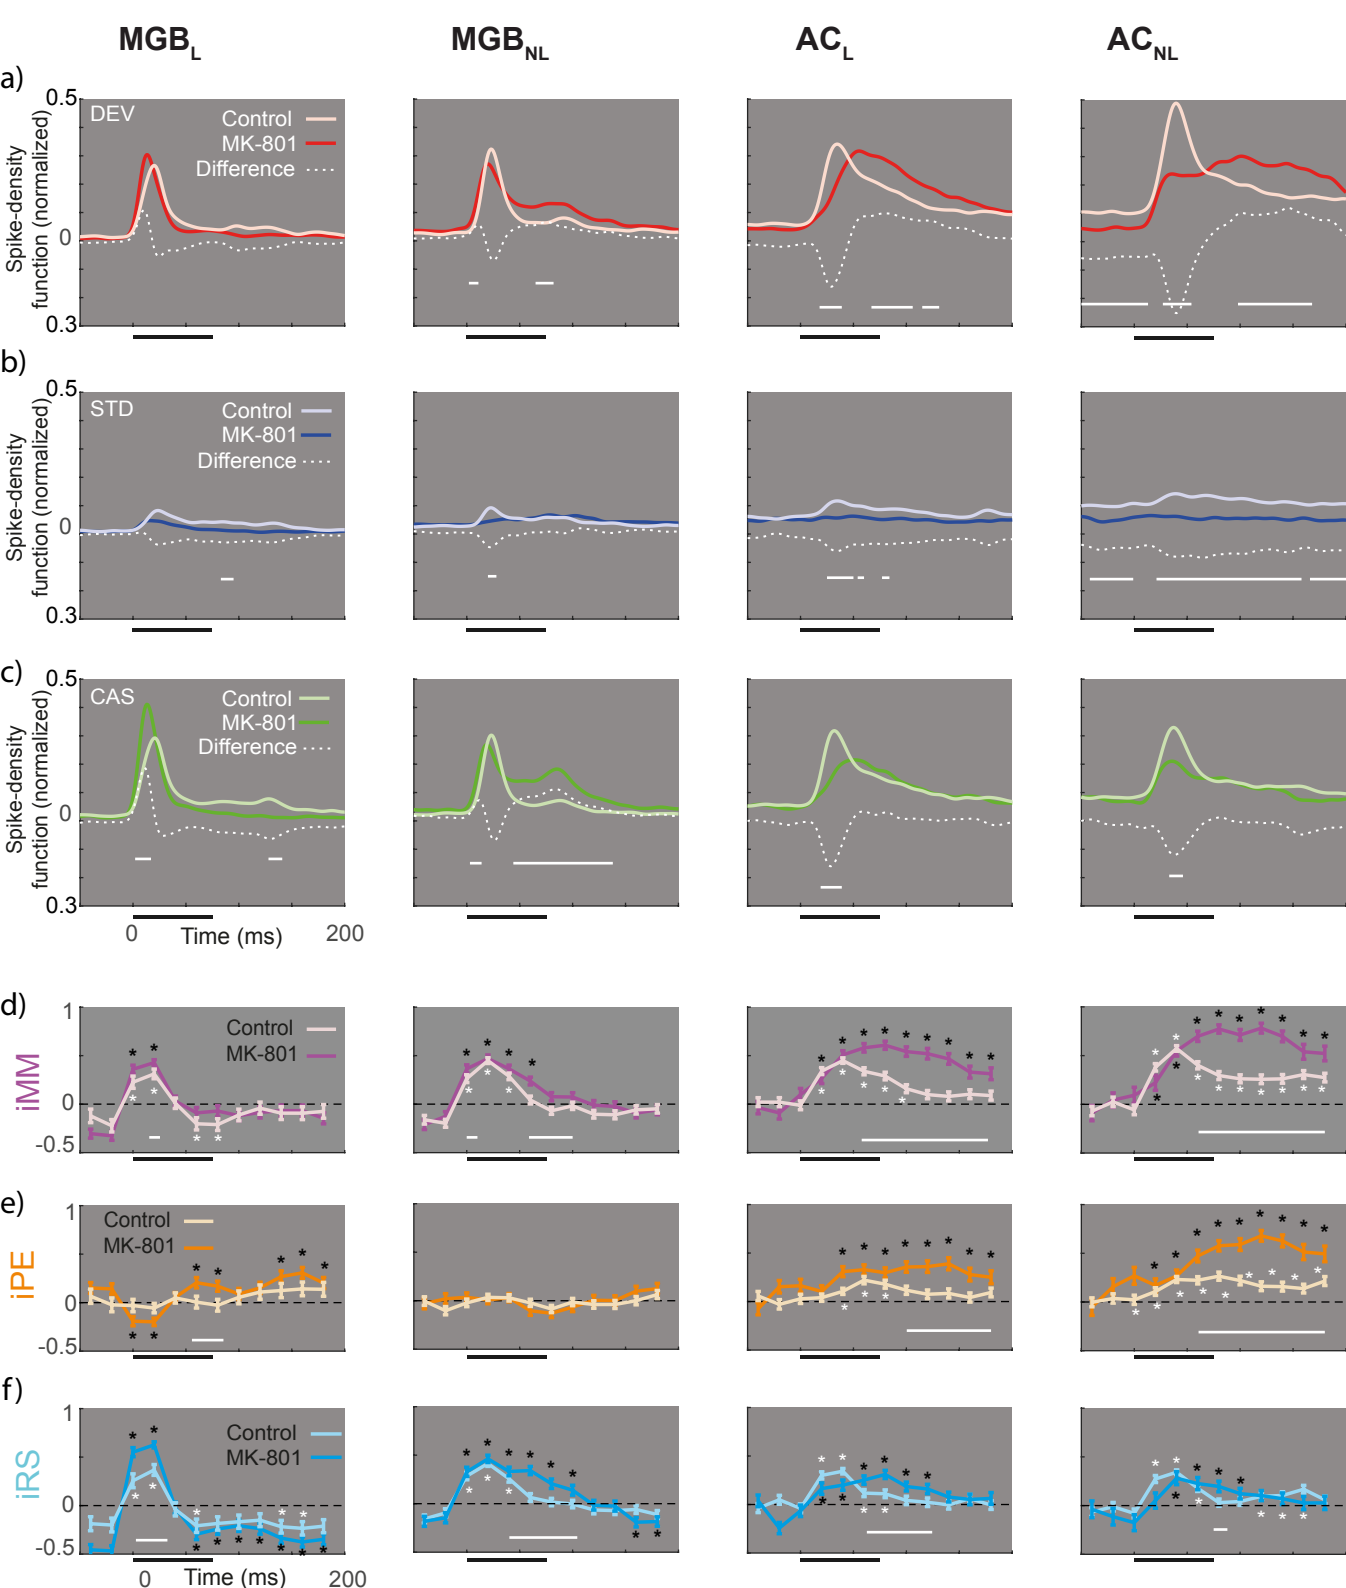

**Figure 3. Spike Density Function.** Peristimulus time histogram along the thalamocortical axis. **a-c)** Averaged firing rate profiles for each condition as normalized spike-density function (light colors for control and bright color for MK801 group), and their respective differences (white dotted lines). Solid horizontal white lines represent the time in which the difference between groups is significant (two-sample  $t$  test  $p < 0.05$ , Bonferroni corrected). **d-f)** Indices over time computed for 12 intervals (from -50 to 190ms) compared against zero (signed-rank test and FDR corrected for 12 comparisons; \*  $p < 0.01$ ) for each group (light colors for control and bright color for MK801 group). Solid white lines denote differences between groups across time intervals (two-sample  $t$  test for each of the 12-time windows,  $p < 0.05$ ).

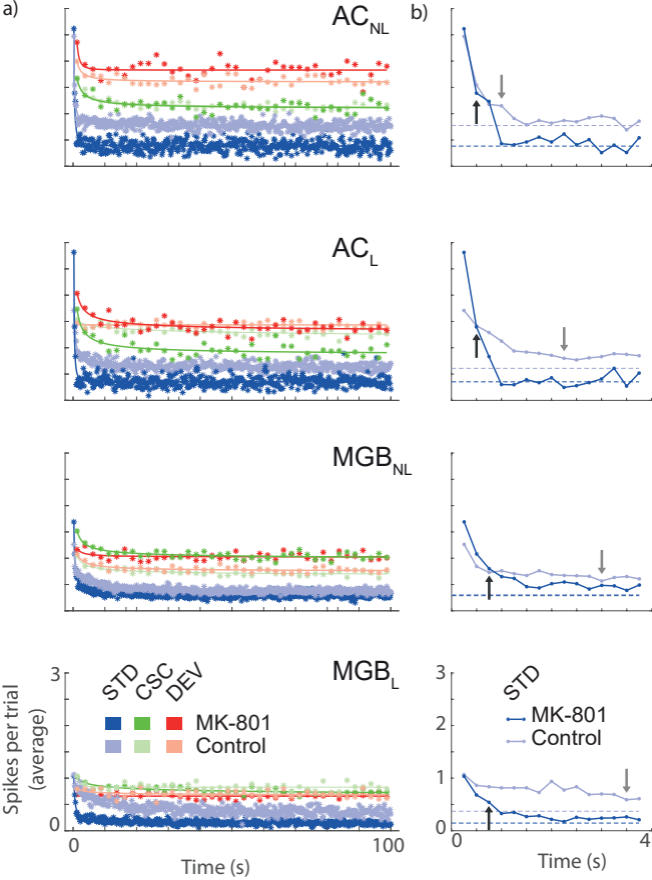

**Figure 4. Time course for dynamical thalamocortical adaptation.** **a)** Averaged time course for the stimulus played in relation to the time elapsed from the beginning of the sequence. **b)** The first fifteen standard stimuli showing the three parameters of the power law fitted: *a* initial average response; *b* adaptation velocity; and *c* the steady-state value (dotted lines) for each group. Arrows represent the 50% of the initial responses demonstrating faster adaptation in the MK801 group and the break down in the dynamical hierarchy of adaptation.

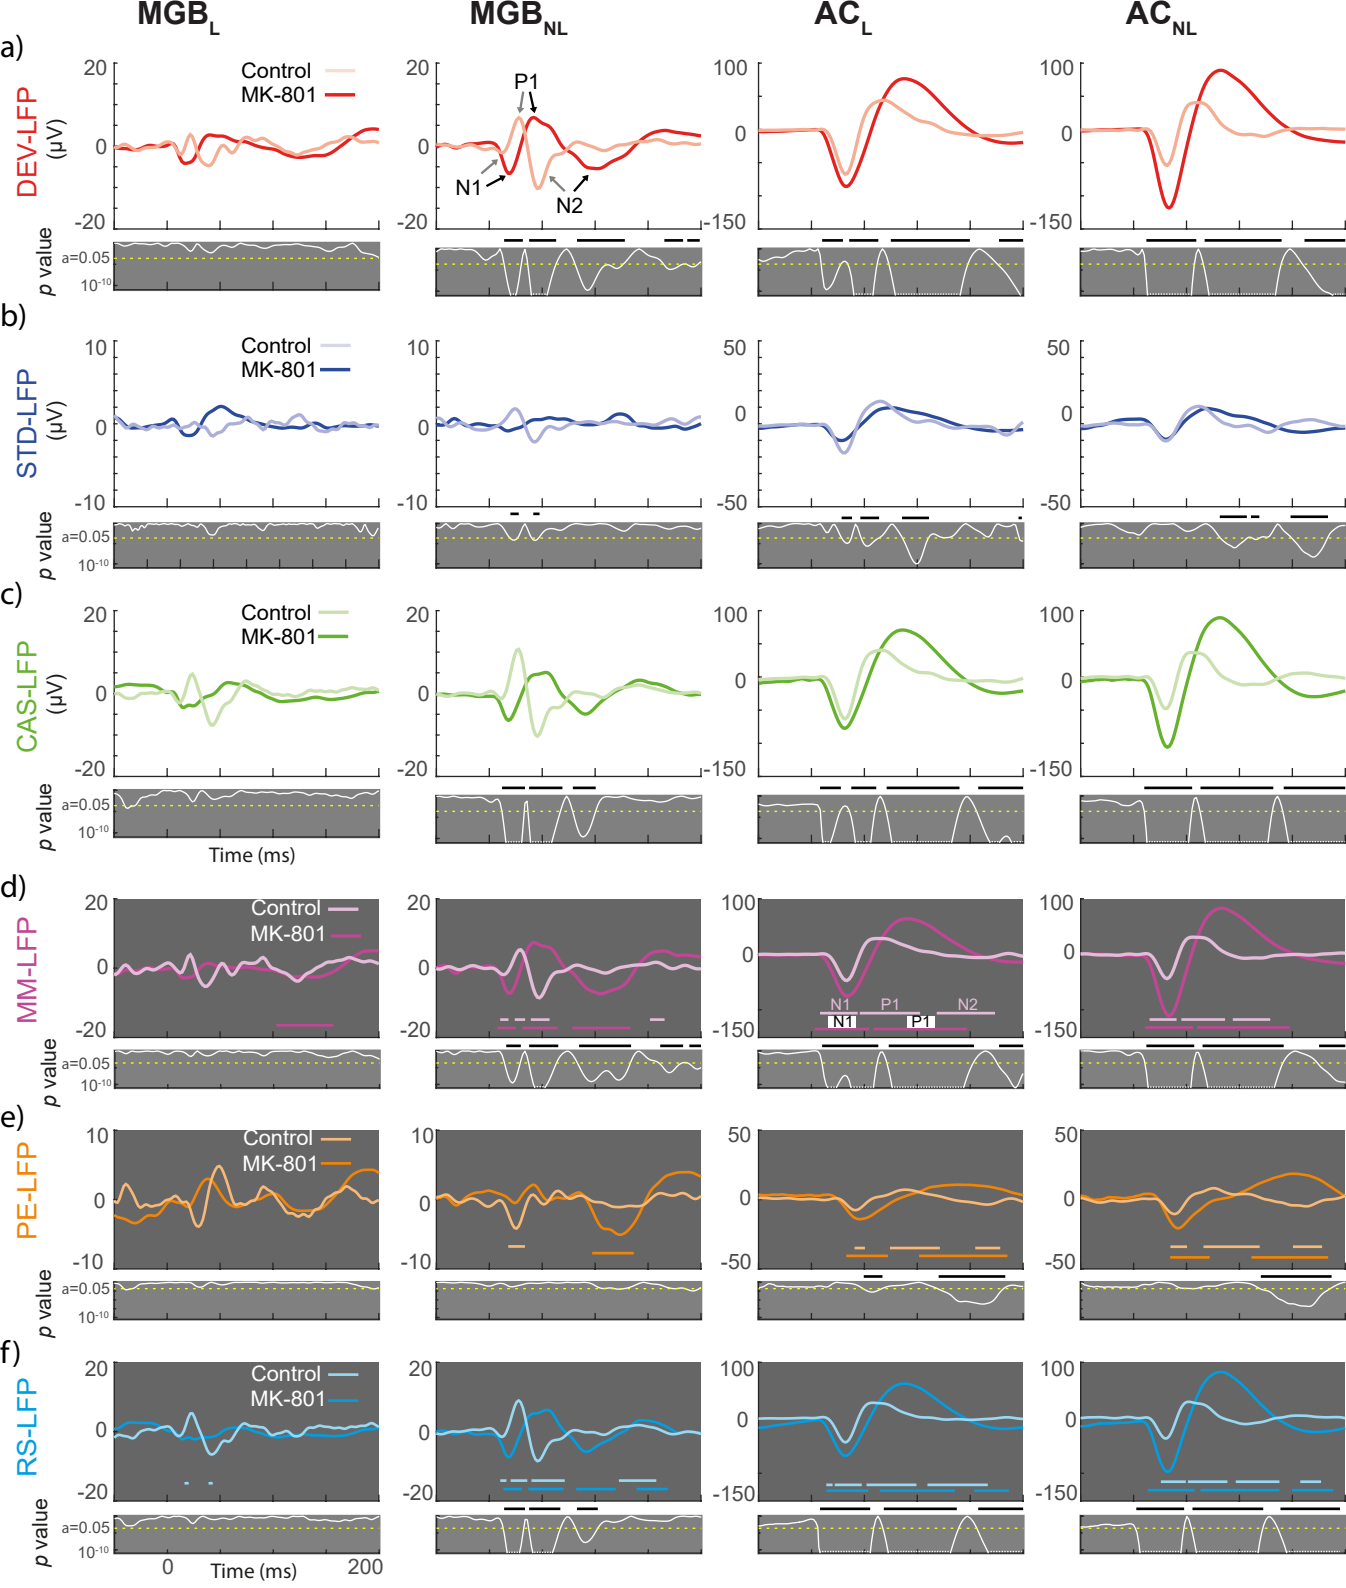



**Figure 5. Local Field Potentials for each condition and their differences. a-c)** Population grand-averaged LFP for each condition recorded (CAS, DEV and STD) within each group (controls and MK801). Grey panels under the main LFP representations shows the instantaneous  $p$  value (white trace) of corresponding stimulus condition LFP (critical threshold set at 0.05 represented as a horizontal dotted yellow line). The thick black horizontal bars in figure 5a-c highlights the time interval for which the LFP comparison between the control and MK801 groups is significant. **d-f)** Population grand-averaged LFP for and neuronal Mismatch ( $MM-LFP=LFP_{DEV}-LFP_{STD}$ ), Prediction Error ( $PE-LFP=LFP_{DEV}-LFP_{CAS}$ ), and Repetition Suppression ( $RS-LFP=LFP_{STD}-LFP_{CAS}$ ) respectively. Colored horizontal lines denote significant deflections ( $t$ -test, FDR corrected). Grey panels show the instantaneous  $p$  value (white trace) of corresponding stimulus condition LFP (critical threshold set at 0.05 represented as a horizontal dotted yellow line) and black horizontal lines the time interval in which MK801 and control are statistically different.

a) Medial Geniculate Body Histology

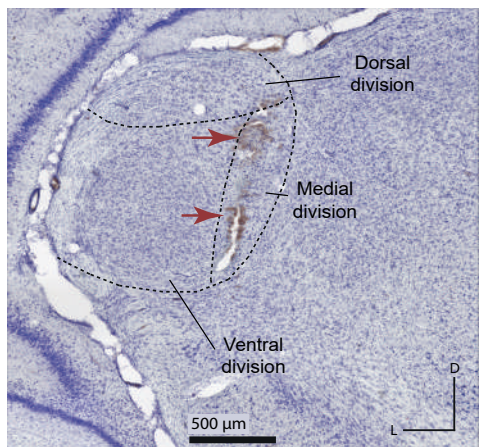

Bregma -5.7

b) Auditory Cortex Tonotopic mapping

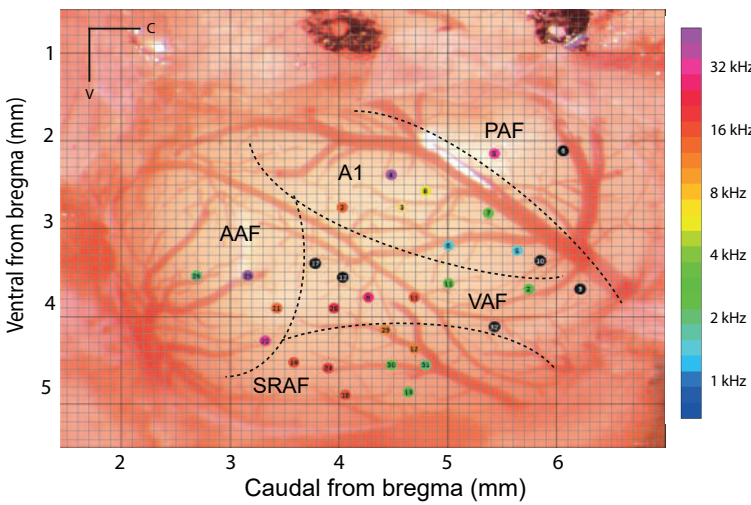

**Figure 6. Anatomical recordings location.** **a)** Photomicrography sample of a MGB Nissl-stained slice (10x), red arrows point the two electrolytic lesions. **b)** Example of localization all recordings made in the AC of one rat, each colored dot represent the characteristic frequency of each performed tract. A1: Primary Auditory Field; AAF: Anterior Auditory Field; VAF: Ventral Auditory Field; PAF: Posterior Auditory Field and SRAF: Suprarhinal Auditory Field.
